# Supplementary material
Source: publisher figshare collection journal article supplement (https://gsapubs.figshare.com/articles/dataset/_/12534209)
Supplement: Supplementary file 1 [file 1]

GSA Data Repository Item 2016306

D'amato, D., Pace, B., Di Nicola, L., Stuart, F.M., Visini, F., Azzaro, R., Branca, S., and Barfod, D.N., 2016, Holocene slip rate variability along the Pernicana fault system (Mt. Etna, Italy): Evidence from offset lava flows: GSA Bulletin, doi:10.1130/B31510.1.

## **DATA REPOSITORY TABLES**

Appendix A (see external file)

Appendix B: following page and additional file.

# HOLOCENE SLIP RATE VARIABILITY ALONG THE PERNICANA FAULT SYSTEM (MT. ETNA, ITALY): EVIDENCE FROM OFFSET LAVA FLOWS

D. D'amato<sup>1</sup>, B. Pace<sup>1</sup>, L. Di Nicola<sup>2</sup>, F.M. Stuart<sup>2</sup>, F. Visini<sup>3</sup>, R. Azzaro<sup>4</sup>, S. Branca<sup>4</sup>, D.N. Barfod<sup>5</sup>

## APPENDIX B

*Ar/Ar data*

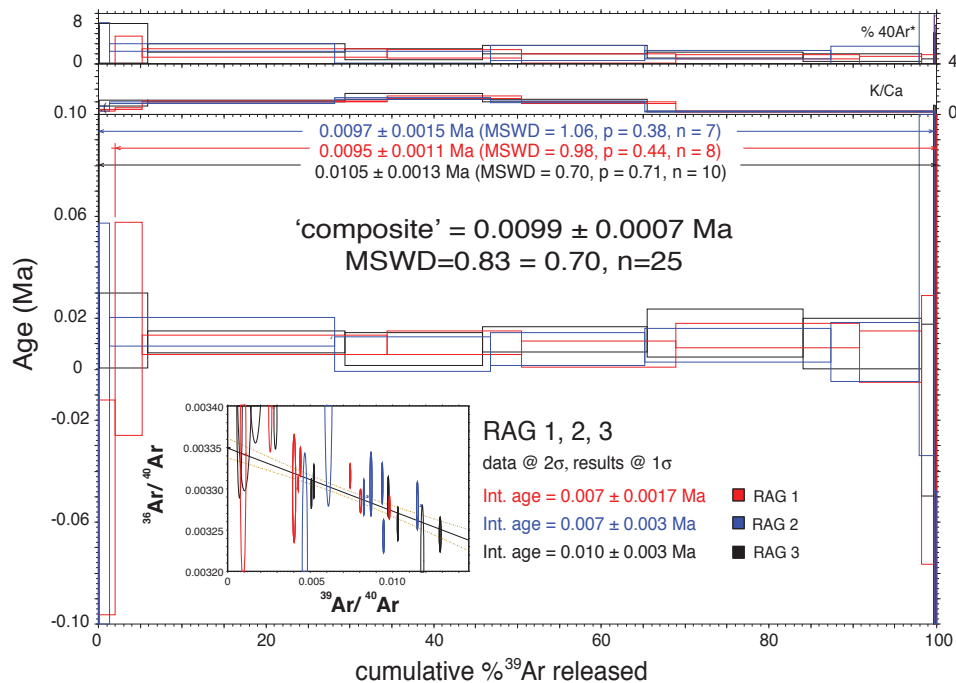

Three separate runs of groundmass material are presented in a plateau diagram, with individual plateau and integrated ages for each aliquot listed. Data and results are color coded (red= RAG 1, blue= RAG 2, black= RAG 3). A composite age is calculated using all of the accepted steps from the individual runs, totaling 25 steps from three runs. The inset figure shows an inverse isochron, calculated using the composite plateau steps.
